# Supplementary material
Source: HighWire-hosted journal article supplement (https://openres.ersjournals.com/content/8/2/00724-2021)
Supplement: inline-supplementary-material-1 [file inline-supplementary-material-1.xlsx]

## Sheet: Supplemental table
	One or more positive NTM cultures			3 or more positive NTM cultures			Restricted to people with samples at least every other year			Not controlling for sputum
	N events = 4077			N events = 1694			N events = 3032			N events = 4077
	exp(coef)	lower .95	upper .95	exp(coef)	lower .95	upper .95	exp(coef)	lower .95	upper .95	exp(coef)	lower .95	upper .95
CFTR modulatory therapy	0.88	0.794	0.974	0.82	0.712	0.945	0.799	0.703	0.907	0.873	0.789	0.967
Combination vs no therapy	0.877	0.78	0.985	0.902	0.772	1.054	0.833	0.719	0.965	0.87	0.775	0.978
Monotherapy vs no therapy	0.889	0.732	1.08	0.62	0.471	0.817	0.72	0.57	0.91	0.883	0.726	1.074
Combination vs monotherapy	0.986	0.79	1.231	1.454	1.066	1.983	1.157	0.881	1.52	0.986	0.789	1.232
Class 3 vs Class 1/2	0.965	0.829	1.122	1.048	0.817	1.344	1.158	0.968	1.385	0.939	0.807	1.093
Class 4/5 vs Class 1/2	1.115	1.01	1.231	1.228	1.055	1.428	1.118	1	1.251	1.11	1.005	1.225
Unknown mutation class vs Class 1/2	0.791	0.647	0.968	0.703	0.493	1.003	0.787	0.626	0.988	0.776	0.634	0.949
